# Supplementary material
Source: Elsevier journal article supplement (https://www.sciencedirect.com/science/article/pii/S1130147322000082)
Supplement: mmc1 [file S1130147322000082:mmc1.pdf]

## **ANNEX A.**

### **Summary of the literature review of 21<sup>st</sup> century series.**

Annex A. Summary of the literature review of 21<sup>st</sup> century series.

| Author                  | N                                            | Mean/Median FU                      | Study goal                                                                                             | Treatment                                                                                                                                                                       | Outcome parameters                                                                                                                                                                            | Disease control                                                                                  | Complications or                                                                                                                                                                                                                                              |
|-------------------------|----------------------------------------------|-------------------------------------|--------------------------------------------------------------------------------------------------------|---------------------------------------------------------------------------------------------------------------------------------------------------------------------------------|-----------------------------------------------------------------------------------------------------------------------------------------------------------------------------------------------|--------------------------------------------------------------------------------------------------|---------------------------------------------------------------------------------------------------------------------------------------------------------------------------------------------------------------------------------------------------------------|
|                         | Study design                                 | (yr)                                |                                                                                                        | recommendations                                                                                                                                                                 |                                                                                                                                                                                               |                                                                                                  | Sequelae                                                                                                                                                                                                                                                      |
| Saint Rose. 2005<br>[1] | 66. Retrospective                            | 7 years (mean)                      | To classify PCPG at presentation to allow rationalization of multimodal therapy to decrease morbidity. | Treatment strategy may be adapted according to the <b>degree of preoperative hypothalamic involvement</b> in order to minimize morbidity.                                       | BMI, HUI index related to hypothalamic types and surgeon experience.                                                                                                                          | 36% recurrence GTR<br>54% recurrence STR                                                         | 90% hormonal therapy. Visual function was improved in 68% but worse in 21%.<br><br>A degree of hyperphagia 70% of the cases (18% severe leading to morbid obesity)<br><br>15% of the children had an impaired neuropsychological evaluation post-operatively. |
|                         | Aim of GTR in 100% at first surgery (33 STR) |                                     |                                                                                                        |                                                                                                                                                                                 |                                                                                                                                                                                               |                                                                                                  |                                                                                                                                                                                                                                                               |
|                         | FSRT 18.18%                                  |                                     |                                                                                                        |                                                                                                                                                                                 |                                                                                                                                                                                               |                                                                                                  |                                                                                                                                                                                                                                                               |
| Thompson. 2005<br>[2]   | 75 historical/ 48 current                    | 5.58 years (mean in current series) | To compare current conservative approach (STR + FSRT) with previous policy (GTR)                       | <b>Avoidance of radical surgery as a primary curative treatment option</b> is associated with a reduction in post-operative morbidity without subsequent fall in rates of cure. | Degree of hydrocephalus<br>Size of tumor<br>Age less than 5y<br>Signs of hypothalamic disturbance<br>Intra-operative complication<br>Removal of tumor observed to be adherent to hypothalamus | Current series:<br>48% recurrence GTR<br>100% recurrence STR alone<br>17.64% recurrence STR+FSRT | Historical series vs current series:<br>Mortality rates 12% vs 4%<br>Neurological sequelae 67% vs 20%<br>Hormonal impairment 99% vs 92%<br>DI 80% vs 73%                                                                                                      |
|                         | 25/48 GTR                                    |                                     |                                                                                                        |                                                                                                                                                                                 |                                                                                                                                                                                               |                                                                                                  |                                                                                                                                                                                                                                                               |
|                         | 23/48 STR                                    |                                     |                                                                                                        |                                                                                                                                                                                 |                                                                                                                                                                                               |                                                                                                  |                                                                                                                                                                                                                                                               |
|                         | 6 STR (<5y)                                  |                                     |                                                                                                        |                                                                                                                                                                                 |                                                                                                                                                                                               |                                                                                                  |                                                                                                                                                                                                                                                               |
|                         | 17 STR+FSRT                                  |                                     |                                                                                                        |                                                                                                                                                                                 |                                                                                                                                                                                               |                                                                                                  |                                                                                                                                                                                                                                                               |

|                              |     |                                                                        |                                                                                                                                                            |                                                                                                                                                                         |                                                                                                                    |                                                                                                           |                                                                                                                                                                                                                                                                                                                                                                         |
|------------------------------|-----|------------------------------------------------------------------------|------------------------------------------------------------------------------------------------------------------------------------------------------------|-------------------------------------------------------------------------------------------------------------------------------------------------------------------------|--------------------------------------------------------------------------------------------------------------------|-----------------------------------------------------------------------------------------------------------|-------------------------------------------------------------------------------------------------------------------------------------------------------------------------------------------------------------------------------------------------------------------------------------------------------------------------------------------------------------------------|
| <b>Pierre-Kahn. 2005 [3]</b> | 14  |                                                                        | Incidence of hypothalamic syndrome after GTR of PCPG                                                                                                       | <b>CPG with preop hypothalamic involvement</b> (abnormal BMI, behavioral disturbances, and/or intraventricular extension) are <b>not amenable to “total” resection.</b> | A large defect at the level of the III V floor on post-surgical MRI is a factor of bad prognosis.                  |                                                                                                           | At 2-year follow-up, only two children (14.3%) were symptom-free, considered as intellectually normal, and at tending normal schooling. The 12 others presented with at least two of the six symptoms constituting the hypothalamic syndrome                                                                                                                            |
| <b>Zuccaro. 2005 [6]</b>     | 153 | A follow up of 1 to 16 years                                           | Results of a radical surgery perspective.                                                                                                                  | <b>The treatment of choice in CPG in childhood is total resection</b> in order to avoid radiation therapy and recurrence.                                               | Surgeon experience                                                                                                 | 0% recurrence GTR<br>51% recurrence STR+RTEF                                                              | 85% supplemental hormonal therapy. Visual status improved markedly after surgery. Surgical complications:<br><br>Subdural hematoma (12%) Seizures (9%) Vascular (6%), Neurological (4%) Infection (4%) Transplanted craniopharyngioma (1%). Shunt malfunction (68%).<br><br>Until December 1994, the overall mortality was 12.5%; 7% (2005). 3.2% perioperative deaths. |
| <b>Puget. 2007 [5]</b>       | 66  | Retrospective: 7 years (median)<br><br>Prospective: 13.8 months (mean) | A retrospective analysis to identify pre-operative PCPG. prognostic factors that would allow stratification of patients, that was applied prospectively to | <b>Multimodal treatment</b> for                                                                                                                                         | Surgeon experience<br><br>Hydrocephalus<br><br>Pre- and post-operative classification of hypothalamic involvement. | 53% recurrence (retrospective series)<br><br>Recurrence rate 36% after GTR and 54% after STR, (intergroup |                                                                                                                                                                                                                                                                                                                                                                         |

|                                  |                                                                                         |                  |                                                                                                                                                                                         |                                                                                                                                                                                                                     |                                                                                                                                                                                                                                 |                                                                                                                                                         |                                                                                                                                                                                                                                                                                                                   |
|----------------------------------|-----------------------------------------------------------------------------------------|------------------|-----------------------------------------------------------------------------------------------------------------------------------------------------------------------------------------|---------------------------------------------------------------------------------------------------------------------------------------------------------------------------------------------------------------------|---------------------------------------------------------------------------------------------------------------------------------------------------------------------------------------------------------------------------------|---------------------------------------------------------------------------------------------------------------------------------------------------------|-------------------------------------------------------------------------------------------------------------------------------------------------------------------------------------------------------------------------------------------------------------------------------------------------------------------|
|                                  | Prospective cohort<br>(treatment stratified<br>according to risk<br>factors)            |                  | another cohort of<br>patients.                                                                                                                                                          |                                                                                                                                                                                                                     | Hyperphagia<br><br>Neuropsychological<br>dysfunction.                                                                                                                                                                           | difference was not<br>significant)                                                                                                                      |                                                                                                                                                                                                                                                                                                                   |
| <b>Elliott. 2010 [23]</b>        | 86<br><br>Retrospective                                                                 | 9 years (mean)   | Overall and<br>progression-free<br>survivals and outcomes<br>in a large series of<br>children who underwent<br>GTR of primary and<br>recurrent CPG<br>performed by a single<br>surgeon. | <b>The treatment of choice<br/>in CP in childhood is<br/>total resection.</b>                                                                                                                                       | Surgeon experience<br><br>Risk factors for STR: prior<br>RT, size of the tumor.<br><br>Risk factors affecting OS<br>and PFS after radical<br>resection of CP were<br>hydrocephalus, VP shunt<br>and size > or equal to 5<br>cm. | 20% recurrence GTR.<br><br>There was no difference<br>in the rate of recurrence<br>between the primary<br>and the recurrent<br>tumors.                  | 15% died during the study period.<br><br>Overall operative mortality rate of<br>3%.<br><br>Neurological morbidity (53%) Non<br>neurological complications (8%)<br>78% had DI. 24.6% post-operative<br>hypothalamic dysfunction.                                                                                   |
| <b>Cavalheiro. 2010<br/>[16]</b> | 60<br><br>Prospective and<br>multicenter<br><br>> 60% of the tumor<br>volume was cystic | 44 months (mean) | To demonstrate that the<br>use of ICC with INF $\alpha$ is<br>a simple method, with a<br>very low cost, that<br>allows the control of<br>cystic CPG                                     | The <b>use of INF<math>\alpha</math> for the<br/>treatment of cystic forms<br/>of CPG</b> is efficacious,<br>easy to handle, and<br>available at a low cost; it is<br>also associated with a low<br>morbidity rate. |                                                                                                                                                                                                                                 | Disease control was<br>achieved in 78.3% of<br>the patients (they<br>considered disease to be<br>controlled when a<br>tumor decreased more<br>than 50%) | 30% of the patients had some kind<br>of side effect due to INF $\alpha$ 2A therapy<br>(headache, palpebral edema, fever,<br>chronic fatigue syndrome and<br>arthritis)<br><br>Only 13% of patients developed a<br>worsening of endocrine function, no<br>patient developed severe<br>hypothalamic disturbances or |

|                           |                                                                                                                                                                |                  |                                                                                                                                                    |                                                                                                                                                                        |                                                                                                                                                                                                 |                                                                                                                                              |                                                                                                                                                                                                                                                                                                                                                                      |
|---------------------------|----------------------------------------------------------------------------------------------------------------------------------------------------------------|------------------|----------------------------------------------------------------------------------------------------------------------------------------------------|------------------------------------------------------------------------------------------------------------------------------------------------------------------------|-------------------------------------------------------------------------------------------------------------------------------------------------------------------------------------------------|----------------------------------------------------------------------------------------------------------------------------------------------|----------------------------------------------------------------------------------------------------------------------------------------------------------------------------------------------------------------------------------------------------------------------------------------------------------------------------------------------------------------------|
|                           |                                                                                                                                                                |                  |                                                                                                                                                    |                                                                                                                                                                        |                                                                                                                                                                                                 |                                                                                                                                              | became obese and the mortality rate was 0%.                                                                                                                                                                                                                                                                                                                          |
| <b>Mallucci. 2012 [7]</b> | 20<br><br>Prospective<br><br>Endoscopic drainage of tumor cyst + risk grade and surgical strategy.<br><br>Definitive surgery was performed in 4–6 weeks’ time. | 3 years (median) | To review their management of patients with CPG using a risk stratification system that combines the CCLG guidelines and the Paris staging system. | <b>Re-stratification before and after endoscopic decompression</b> of the cystic component and hydrocephalus.                                                          | Hypothalamic syndrome at presentation, hydrocephalus, tumor size and the radiological three-point Paris grading, were combined to produce four subgroups: very high, high, medium and low risk. | GTR (30%), NTR (25%) or STR (45%)                                                                                                            | No complications associated with the neuroendoscopic procedures. No surgical-related mortality. Two new visual field defects. No hypothalamic complications.<br><br>Post-operative complications: one extradural hematoma, seizure and a cerebrospinal fluid fistula.<br><br>47 % patients were deficient in all anterior pituitary hormones and 16 patients had DI. |
| <b>Cohen. 2013 [17]</b>   | 33 (2001-2011) 43 (1990-2001) 50 (1975-1989)<br><br>Retrospective                                                                                              | 4 years (mean)   | They aim to compare long-term outcomes of pediatric CP treated over the last decade vs historical series.                                          | Treatment approach to CP has shifted from a goal of “curative” tumor resection to use of <b>minimalistic surgery plus adjuvant treatment to reduce tumor symptoms.</b> | Younger age at diagnosis and degree of hypothalamic involvement.                                                                                                                                | Recurrence rates were not significantly different among the 3 time periods, shifting from 34% and 30% in the past to 52% in the last decade. | Prevalence of pituitary hormone deficiency has decreased significantly compared with the last decade, including both anterior panhypopituitarism and DI. The prevalence of obesity decreased by 10% and that of severe obesity by 36% ( not significant.)<br><br>Survival rate in this series was 97%.                                                               |

|                           |                                                                 |                                                              |                                                                                                  |                                                                                                                                                                                                                                                                    |                     |                                                                                                                                                               |                                                                                                                                                                                                                                                                                                                                                                                                                                                                                                            |
|---------------------------|-----------------------------------------------------------------|--------------------------------------------------------------|--------------------------------------------------------------------------------------------------|--------------------------------------------------------------------------------------------------------------------------------------------------------------------------------------------------------------------------------------------------------------------|---------------------|---------------------------------------------------------------------------------------------------------------------------------------------------------------|------------------------------------------------------------------------------------------------------------------------------------------------------------------------------------------------------------------------------------------------------------------------------------------------------------------------------------------------------------------------------------------------------------------------------------------------------------------------------------------------------------|
| <b>Hoffman. 2014 [15]</b> | 120 KPHG2000. 106 KPHG 2007.<br><br>Prospective and multicenter | 6.78 years (mean) KPHG2000<br><br>2.22 years (mean) KPHG2007 | To analyzed childhood CPG patients of the studies KPHG 2000/2007.                                | A trend towards <b>more hypothalamus-sparing surgical strategies</b> in childhood CPG.<br><br><b>FSRT is recommended for treatment and/or prevention of progression after STR</b>                                                                                  | Surgical expertise. | Comparing KPHG 2000 vs 2007, 3-year event free survival rates were higher in patients after GTR (89% vs 77%) when compared to patients after STR (33% vs 32%) | The 3-year overall survival rate in KPHG 2000 was $0.97 \pm 0.015$ . In KPHG 2007, no lethal event was encountered up to now (September 2013)                                                                                                                                                                                                                                                                                                                                                              |
| <b>Amayiri. 2017 [8]</b>  | 24<br><br>Retrospective                                         | 4.5 years (median)                                           | To review the experience in the management of pediatric CPG in a LMIC, with emphasis on the QoL. | It is important, to have a <b>locally feasible plan</b> to care of children with CPG. It may be practical <b>to accept less than a GTR to avoid further hypothalamic injury and morbidities.</b><br><br>Multidisciplinary teams and second opinions, from experts. |                     | 54% needed multiple surgical resections, with a median of two interventions (range 2–4)                                                                       | Post-operative complications were mainly related to electrolyte imbalance. Four patients had significant post-operative hypothalamic symptoms.<br><br>17% died and 13% were lost to follow-up. One immediate postoperative mortality was due to major cerebral infarction following STR.<br><br>At last follow-up, VA stabilized in 33 (69%). Almost all patients were on multiple hormonal supplements. All GTR were overweight or obese. Hyperlipidemia (41%), and liver with fatty changes (67%). 11/17 |

|                  |                                            |                   |                                                             |                                                                                                                                  |                                                                                                                                                                                                           |                                                                                                                                                                                                                                                                                                                                                                                                                      |
|------------------|--------------------------------------------|-------------------|-------------------------------------------------------------|----------------------------------------------------------------------------------------------------------------------------------|-----------------------------------------------------------------------------------------------------------------------------------------------------------------------------------------------------------|----------------------------------------------------------------------------------------------------------------------------------------------------------------------------------------------------------------------------------------------------------------------------------------------------------------------------------------------------------------------------------------------------------------------|
|                  |                                            |                   |                                                             |                                                                                                                                  |                                                                                                                                                                                                           | patients (65%) were attending school. 53% low self-esteem and difficulties to engage with peers. Two patients had significant behavioral difficulties and attention seeking behaviors.                                                                                                                                                                                                                               |
| Fouda. 2020 [18] | 45 old era/90 new era<br><br>Retrospective | 10 years (median) | To demonstrate the paradigm shift in management strategies. | Aggressive resection-related <b>morbidities are balanced</b> by the avoidance of radiation-induced morbidities and the contrary. | 29% recurrence (new era) 31% recurrence (old era) STR/cyst drainage + FSRT has similar rate of recurrence in comparison with GTR. STR without adjuvant FSRT was associated with a 71% risk of recurrence. | 4% patients died.<br><br>Visual function improved in 13% patients while it deteriorated in 18%<br><br>Panhypopituitarism was evident in 75%.<br><br>New-onset DI in 61% patients.<br><br>Radiation induced moyamoya was 11%. Intracranial aneurysm was evident in 5%.<br><br>Psychological impairment was documented in 22% and learning disabilities in 28%.<br><br>New-onset hypothalamic obesity in 34% patients. |

|                     |                           |                       |                                                                                                                                                    |                                                                                                                  |                                                                             |                                                                                       |                                                                                                                                                                                                                                |
|---------------------|---------------------------|-----------------------|----------------------------------------------------------------------------------------------------------------------------------------------------|------------------------------------------------------------------------------------------------------------------|-----------------------------------------------------------------------------|---------------------------------------------------------------------------------------|--------------------------------------------------------------------------------------------------------------------------------------------------------------------------------------------------------------------------------|
|                     |                           |                       |                                                                                                                                                    |                                                                                                                  |                                                                             |                                                                                       | Radiation-induced secondary malignancies were seen 4% patients.                                                                                                                                                                |
|                     |                           |                       |                                                                                                                                                    |                                                                                                                  |                                                                             |                                                                                       | Seizures were evident in 15 patients (three had seizures preoperatively).                                                                                                                                                      |
|                     |                           |                       |                                                                                                                                                    |                                                                                                                  |                                                                             |                                                                                       | Motor dysfunction was evident in seven patients.                                                                                                                                                                               |
| Al Shail. 2020 [25] | 35.<br><br>Retrospective. | 156.9 months (median) | To investigate factors related to recurrence of CPG.                                                                                               | Twenty-four patients (70.6%) had GTR. There were 12/35 patients who received radiotherapy.                       | VP shunt presence at presentation.                                          | Rate of disease recurrence was 42.9% (15 patients)                                    | Probability of 10-year overall survival was observed at $0.889 \pm 0.105$ .<br><br>Postsurgical panhypopituitarism was observed in nine (25.7%) patients. VP shunt was inserted in 12 (34.3%) patients                         |
| Liu. 2020 [24]      | 28<br><br>Retrospective   | 6.1 years (median)    | To review the experience of managing CP over the past 20 years. To investigate patient survival, predictors of outcome, and long-term morbidities. | The treatment approaches were heterogeneous. GTR/NTR in 39% STR 50% and Biopsy+IFN 11% patients. Adjuvant RT 32% | Patients treated in a high-volume center had significantly better outcomes. | 43% patients experienced disease progression (median time to progression = 1.4 years) | Among the survivors (n = 25), 60% had chronic visual impairments. Endocrinopathies were present in 92% patients. 64% patients were overweight or obese at their last evaluation, with one patient requiring bariatric surgery. |

|                         |     |                       |                                                                         |                                                                                                                                                                                                   |                                                                                                               |                                                                                                                                                                                                                     |                                                  |
|-------------------------|-----|-----------------------|-------------------------------------------------------------------------|---------------------------------------------------------------------------------------------------------------------------------------------------------------------------------------------------|---------------------------------------------------------------------------------------------------------------|---------------------------------------------------------------------------------------------------------------------------------------------------------------------------------------------------------------------|--------------------------------------------------|
| <b>Enayet. 2021 [9]</b> | 130 | 43.95 months (median) | To report their experience and management strategies for childhood CPG. | Management protocol is presented based on <b>individualized surgical approach</b> (guided by preoperative imaging and intraoperative findings) <b>and tumor genetics</b> (Beta-catenin mutations) | Beta-catenin mutations more than 5% were associated with statistically trending aggressive clinical behavior. | 5-year PFS was 52.3%, (34.49% for the follow-up group and 72.25% for the RT group)<br>Median time to progression in the follow-up cohort and the radiotherapy cohort was 20.5 months and 44.3 months, respectively. | Mortality was reported in eight patients (8/137) |
|-------------------------|-----|-----------------------|-------------------------------------------------------------------------|---------------------------------------------------------------------------------------------------------------------------------------------------------------------------------------------------|---------------------------------------------------------------------------------------------------------------|---------------------------------------------------------------------------------------------------------------------------------------------------------------------------------------------------------------------|--------------------------------------------------|
